# Supplementary material
Source: publisher figshare collection journal article supplement (https://acs.figshare.com/ndownloader/files/11509031)
Supplement: Supplementary file 1 [file 11509031]

data_complex_1
_audit_creation_date              2014-06-20
_audit_creation_method
;
Olex2 1.2
(compiled 2014.06.18 svn.r2945 for OlexSys, GUI svn.r4846)
;
_shelxl_version_number            2013-4
_publ_contact_author_address      ?
_publ_contact_author_email        ?
_publ_contact_author_name         ''
_publ_contact_author_phone        ?
_publ_section_references
;
Dolomanov, O.V., Bourhis, L.J., Gildea, R.J, Howard, J.A.K. & Puschmann, H.
 (2009), J. Appl. Cryst. 42, 339-341.

Sheldrick, G.M. (2008). Acta Cryst. A64, 112-122.
;
_chemical_name_common             ?
_chemical_name_systematic
;
 ?
;
_chemical_formula_moiety          'C54 H35 Cl8 N4 O Ru, C4 H10 O, C3 H7'
_chemical_formula_sum             'C61 H52 Cl8 N4 O2 Ru'
_chemical_formula_weight          1257.73
_chemical_melting_point           ?
loop_
  _atom_type_symbol
  _atom_type_description
  _atom_type_scat_dispersion_real
  _atom_type_scat_dispersion_imag
  _atom_type_scat_source
 'C' 'C' 0.0181 0.0091 'International Tables Vol C Tables 4.2.6.8 and 6.1.1.4'
 'H' 'H' 0.0000 0.0000 'International Tables Vol C Tables 4.2.6.8 and 6.1.1.4'
 'Cl' 'Cl' 0.3639 0.7018 'International Tables Vol C Tables 4.2.6.8 and 6.1.1.4'
 'N' 'N' 0.0311 0.0180 'International Tables Vol C Tables 4.2.6.8 and 6.1.1.4'
 'O' 'O' 0.0492 0.0322 'International Tables Vol C Tables 4.2.6.8 and 6.1.1.4'
 'Ru' 'Ru' 0.0552 3.2960 'International Tables Vol C Tables 4.2.6.8 and 6.1.1.4'

_shelx_space_group_comment
;
The symmetry employed for this shelxl refinement is uniquely defined
by the following loop, which should always be used as a source of
symmetry information in preference to the above space-group names.
They are only intended as comments.
;
_space_group_crystal_system       'monoclinic'
_space_group_IT_number            14
_space_group_name_H-M_alt         'P 1 21/n 1'
_space_group_name_Hall            '-P 2yn'
loop_
  _space_group_symop_operation_xyz
 'x, y, z'
 '-x+1/2, y+1/2, -z+1/2'
 '-x, -y, -z'
 'x-1/2, -y-1/2, z-1/2'

_cell_length_a                    12.5729(12)
_cell_length_b                    21.6205(16)
_cell_length_c                    21.910(2)
_cell_angle_alpha                 90
_cell_angle_beta                  95.011(4)
_cell_angle_gamma                 90
_cell_volume                      5932.9(9)
_cell_formula_units_Z             4
_cell_measurement_reflns_used     2707
_cell_measurement_temperature     100
_cell_measurement_theta_max       65.359
_cell_measurement_theta_min       29.465
_shelx_estimated_absorpt_T_max    0.722
_shelx_estimated_absorpt_T_min    0.324
_exptl_absorpt_coefficient_mu     5.814
_exptl_absorpt_correction_T_max   0.7529
_exptl_absorpt_correction_T_min   0.4553
_exptl_absorpt_correction_type    multi-scan
_exptl_absorpt_process_details
;
SADABS-2008/1 (Bruker,2008) was used for absorption correction.
wR2(int) was 0.1325 before and 0.0983 after correction.
The Ratio of minimum to maximum transmission is 0.6047.
The \l/2 correction factor is 0.0015.
;
_exptl_crystal_colour             black
_exptl_crystal_colour_primary     black
_exptl_crystal_density_diffrn     1.408
_exptl_crystal_density_meas       ?
_exptl_crystal_density_method     ?
_exptl_crystal_description        prism
_exptl_crystal_F_000              2568
_exptl_crystal_size_max           0.25
_exptl_crystal_size_mid           0.06
_exptl_crystal_size_min           0.06
_exptl_special_details
;
 ?
;
_exptl_transmission_factor_max    ?
_exptl_transmission_factor_min    ?
_diffrn_reflns_av_R_equivalents   0.0809
_diffrn_reflns_av_unetI/netI      0.0487
_diffrn_reflns_Laue_measured_fraction_full 0.951
_diffrn_reflns_Laue_measured_fraction_max 0.965
_diffrn_reflns_limit_h_max        13
_diffrn_reflns_limit_h_min        -14
_diffrn_reflns_limit_k_max        25
_diffrn_reflns_limit_k_min        -19
_diffrn_reflns_limit_l_max        24
_diffrn_reflns_limit_l_min        -25
_diffrn_reflns_number             72964
_diffrn_reflns_point_group_measured_fraction_full 0.951
_diffrn_reflns_point_group_measured_fraction_max 0.965
_diffrn_reflns_theta_full         67.679
_diffrn_reflns_theta_max          67.005
_diffrn_reflns_theta_min          2.877
_diffrn_ambient_temperature       100
_diffrn_detector_area_resol_mean  ?
_diffrn_measured_fraction_theta_full 0.951
_diffrn_measured_fraction_theta_max 0.965
_diffrn_measurement_device_type   ?
_diffrn_measurement_method        ?
_diffrn_radiation_type            CuK\a
_diffrn_radiation_wavelength      1.54178
_diffrn_source                    ?
_reflns_Friedel_coverage          0.000
_reflns_Friedel_fraction_full     .
_reflns_Friedel_fraction_max      .
_reflns_number_gt                 8606
_reflns_number_total              10195
_reflns_special_details
;
 Reflections were merged by SHELXL according to the crystal
 class for the calculation of statistics and refinement.
 
 _reflns_Friedel_fraction is defined as the number of unique
 Friedel pairs measured divided by the number that would be
 possible theoretically, ignoring centric projections and
 systematic absences.
;
_reflns_threshold_expression      'I > 2\s(I)'
_computing_cell_refinement        'SAINT v7.68A (Bruker, 2009)'
_computing_data_collection        ?
_computing_data_reduction         'SAINT v7.68A (Bruker, 2009)'
_computing_molecular_graphics     'Olex2 (Dolomanov et al., 2009)'
_computing_publication_material   'Olex2 (Dolomanov et al., 2009)'
_computing_structure_refinement   'ShelXL (Sheldrick, 2008)'
_computing_structure_solution     'ShelXS (Sheldrick, 2008)'
_refine_diff_density_max          1.556
_refine_diff_density_min          -1.292
_refine_diff_density_rms          0.128
_refine_ls_extinction_coef        .
_refine_ls_extinction_method      none
_refine_ls_goodness_of_fit_ref    1.069
_refine_ls_hydrogen_treatment     constr
_refine_ls_matrix_type            full
_refine_ls_number_parameters      707
_refine_ls_number_reflns          10195
_refine_ls_number_restraints      18
_refine_ls_R_factor_all           0.0781
_refine_ls_R_factor_gt            0.0641
_refine_ls_restrained_S_all       1.071
_refine_ls_shift/su_max           0.000
_refine_ls_shift/su_mean          0.000
_refine_ls_structure_factor_coef  Fsqd
_refine_ls_weighting_details
'w=1/[\s^2^(Fo^2^)+(0.0748P)^2^+29.9429P] where P=(Fo^2^+2Fc^2^)/3'
_refine_ls_weighting_scheme       calc
_refine_ls_wR_factor_gt           0.1642
_refine_ls_wR_factor_ref          0.1784
_refine_special_details
;
 ?
;
_olex2_refinement_description
;
1. Fixed Uiso
 At 1.2 times of:
  All C(H) groups, All C(H,H) groups
 At 1.5 times of:
  All C(H,H,H) groups, All C(H,H,H,H,H,H) groups
2. Restrained distances
 C59-C60 = C61-C60 = C59_$1-C59
 1.54 with sigma of 0.01
3. Rigid bond restraints
 C61, C60, C59
 with sigma for 1-2 distances of 0.01 and sigma for 1-3 distances of 0.01
4. Uiso/Uaniso restraints and constraints
C61 \\sim C60 \\sim C59: within 1.7A with sigma of 0.01 and sigma for terminal
atoms of 0.02
5. Others
 Sof(H54D)=Sof(H54E)=Sof(H54F)=Sof(H52D)=Sof(H52E)=Sof(H52F)=Sof(C51A)=
 Sof(H51C)=Sof(H51D)=Sof(C53A)=Sof(H53C)=Sof(H53D)=1-FVAR(1)
 Sof(H54A)=Sof(H54B)=Sof(H54C)=Sof(H52A)=Sof(H52B)=Sof(H52C)=Sof(C51)=
 Sof(H51A)=Sof(H51B)=Sof(C53)=Sof(H53A)=Sof(H53B)=FVAR(1)
6.a Secondary CH2 refined with riding coordinates:
 C56(H56A,H56B), C57(H57A,H57B), C51(H51A,H51B), C53(H53A,H53B), C51A(H51C,
 H51D), C53A(H53C,H53D), C60(H60A,H60B), C59(H59A,H59B)
6.b Me refined with riding coordinates:
 C54(H54A,H54B,H54C), C54(H54D,H54E,H54F), C52(H52A,H52B,H52C), C52(H52D,H52E,
 H52F)
6.c Aromatic/amide H refined with riding coordinates:
 C2(H2), C46(H46), C8(H8), C12(H12), C13(H13), C17(H17), C31(H31), C3(H3),
 C18(H18), C36(H36), C25(H25), C23(H23), C41(H41), C50(H50), C35(H35), C49(H49),
  C7(H7), C48(H48), C37(H37), C24(H24), C42(H42), C43(H43), C47(H47), C30(H30),
 C29(H29)
6.d Idealised Me refined as rotating group:
 C55(H55A,H55B,H55C), C58(H58A,H58B,H58C), C61(H61A,H61B,H61C)
;
_atom_sites_solution_hydrogens    geom
_atom_sites_solution_primary      heavy
_atom_sites_solution_secondary    ?
loop_
  _atom_site_label
  _atom_site_type_symbol
  _atom_site_fract_x
  _atom_site_fract_y
  _atom_site_fract_z
  _atom_site_U_iso_or_equiv
  _atom_site_adp_type
  _atom_site_occupancy
  _atom_site_site_symmetry_order
  _atom_site_calc_flag
  _atom_site_refinement_flags_posn
  _atom_site_refinement_flags_adp
  _atom_site_refinement_flags_occupancy
  _atom_site_disorder_assembly
  _atom_site_disorder_group
 Ru1 Ru 0.99651(3) 0.08009(2) 0.76345(2) 0.02350(14) Uani 1 1 d . . . . .
 Cl5 Cl 0.74933(11) 0.28587(6) 0.70928(7) 0.0404(3) Uani 1 1 d . . . . .
 Cl7 Cl 0.90909(12) 0.06445(6) 0.52289(7) 0.0408(3) Uani 1 1 d . . . . .
 Cl1 Cl 1.23964(12) -0.13128(7) 0.82435(8) 0.0486(4) Uani 1 1 d . . . . .
 Cl2 Cl 1.39425(11) 0.05015(8) 0.68749(8) 0.0514(4) Uani 1 1 d . . . . .
 Cl8 Cl 0.76502(14) -0.12282(7) 0.65496(7) 0.0512(4) Uani 1 1 d . . . . .
 N3 N 0.9468(3) 0.14863(19) 0.8180(2) 0.0270(9) Uani 1 1 d . . . . .
 N2 N 1.1397(3) 0.07750(18) 0.8138(2) 0.0264(9) Uani 1 1 d . . . . .
 N4 N 0.8497(3) 0.07863(18) 0.7166(2) 0.0272(9) Uani 1 1 d . . . . .
 N1 N 1.0427(3) 0.00869(18) 0.71199(19) 0.0245(9) Uani 1 1 d . . . . .
 Cl6 Cl 0.58532(14) 0.10043(9) 0.83579(13) 0.0834(8) Uani 1 1 d . . . . .
 Cl4 Cl 1.20558(13) 0.28226(7) 0.83922(7) 0.0485(4) Uani 1 1 d . . . . .
 Cl3 Cl 1.12689(18) 0.12109(9) 1.01709(8) 0.0670(5) Uani 1 1 d . . . . .
 C1 C 0.9851(4) -0.0184(2) 0.6632(2) 0.0259(10) Uani 1 1 d . . . . .
 C4 C 1.1405(4) -0.0207(2) 0.7169(2) 0.0249(10) Uani 1 1 d . . . . .
 C11 C 1.0076(4) 0.1783(2) 0.8645(2) 0.0284(11) Uani 1 1 d . . . . .
 C45 C 1.0513(4) 0.1435(2) 0.7039(2) 0.0277(11) Uani 1 1 d . . . . .
 C2 C 1.0468(4) -0.0656(2) 0.6376(2) 0.0278(11) Uani 1 1 d . . . . .
 H2 H 1.0247 -0.0912 0.6036 0.033 Uiso 1 1 calc R . . . .
 C9 C 1.1741(4) 0.1166(2) 0.8613(2) 0.0272(11) Uani 1 1 d . . . . .
 C21 C 1.3254(4) -0.0429(2) 0.7568(2) 0.0299(11) Uani 1 1 d . . . . .
 C14 C 0.8478(4) 0.1758(2) 0.8137(3) 0.0297(11) Uani 1 1 d . . . . .
 C6 C 1.2241(4) 0.0386(2) 0.8058(2) 0.0277(11) Uani 1 1 d . . . . .
 C10 C 1.1138(4) 0.1642(2) 0.8839(2) 0.0288(11) Uani 1 1 d . . . . .
 C20 C 0.8813(4) -0.0015(2) 0.6407(2) 0.0273(11) Uani 1 1 d . . . . .
 C46 C 0.9825(5) 0.1777(3) 0.6645(3) 0.0563(19) Uani 1 1 d . . . . .
 H46 H 0.9078 0.1728 0.6662 0.068 Uiso 1 1 calc R . . . .
 C19 C 0.8185(4) 0.0424(2) 0.6663(2) 0.0286(11) Uani 1 1 d . . . . .
 C39 C 0.8360(4) -0.0328(2) 0.5835(2) 0.0300(11) Uani 1 1 d . . . . .
 C8 C 1.2815(4) 0.1013(3) 0.8837(3) 0.0331(12) Uani 1 1 d . . . . .
 H8 H 1.3233 0.1214 0.9160 0.040 Uiso 1 1 calc R . . . .
 C5 C 1.2249(4) -0.0069(2) 0.7612(2) 0.0282(11) Uani 1 1 d . . . . .
 C12 C 0.9449(4) 0.2252(2) 0.8906(3) 0.0349(12) Uani 1 1 d . . . . .
 H12 H 0.9678 0.2523 0.9232 0.042 Uiso 1 1 calc R . . . .
 C13 C 0.8469(4) 0.2233(3) 0.8600(3) 0.0367(13) Uani 1 1 d . . . . .
 H13 H 0.7878 0.2487 0.8675 0.044 Uiso 1 1 calc R . . . .
 C17 C 0.6761(4) 0.1009(3) 0.6820(3) 0.0368(13) Uani 1 1 d . . . . .
 H17 H 0.6073 0.1194 0.6791 0.044 Uiso 1 1 calc R . . . .
 C33 C 0.6601(4) 0.1959(2) 0.7730(3) 0.0332(12) Uani 1 1 d . . . . .
 C16 C 0.7632(4) 0.1153(2) 0.7269(3) 0.0314(12) Uani 1 1 d . . . . .
 C32 C 1.2137(4) 0.2611(2) 0.9162(3) 0.0349(12) Uani 1 1 d . . . . .
 C31 C 1.2630(5) 0.3006(3) 0.9593(3) 0.0449(15) Uani 1 1 d . . . . .
 H31 H 1.2933 0.3383 0.9470 0.054 Uiso 1 1 calc R . . . .
 C3 C 1.1427(4) -0.0673(2) 0.6708(2) 0.0289(11) Uani 1 1 d . . . . .
 H3 H 1.2004 -0.0942 0.6647 0.035 Uiso 1 1 calc R . . . .
 C38 C 0.6446(4) 0.2532(2) 0.7449(3) 0.0326(12) Uani 1 1 d . . . . .
 C26 C 1.4079(4) -0.0214(3) 0.7239(3) 0.0385(13) Uani 1 1 d . . . . .
 C18 C 0.7096(4) 0.0563(3) 0.6448(3) 0.0358(13) Uani 1 1 d . . . . .
 H18 H 0.6691 0.0378 0.6110 0.043 Uiso 1 1 calc R . . . .
 C36 C 0.4654(5) 0.2599(4) 0.7713(4) 0.0594(19) Uani 1 1 d . . . . .
 H36 H 0.3993 0.2813 0.7708 0.071 Uiso 1 1 calc R . . . .
 C28 C 1.1775(6) 0.1910(3) 0.9938(3) 0.0452(15) Uani 1 1 d . . . . .
 C25 C 1.5002(5) -0.0564(4) 0.7176(3) 0.0503(16) Uani 1 1 d . . . . .
 H25 H 1.5556 -0.0406 0.6951 0.060 Uiso 1 1 calc R . . . .
 C40 C 0.7830(5) -0.0893(3) 0.5845(3) 0.0400(14) Uani 1 1 d . . . . .
 C23 C 1.4303(5) -0.1368(3) 0.7768(3) 0.0450(15) Uani 1 1 d . . . . .
 H23 H 1.4372 -0.1768 0.7948 0.054 Uiso 1 1 calc R . . . .
 C44 C 0.8452(4) -0.0066(2) 0.5261(3) 0.0331(12) Uani 1 1 d . . . . .
 C41 C 0.7439(6) -0.1193(3) 0.5311(3) 0.0557(18) Uani 1 1 d . . . . .
 H41 H 0.7085 -0.1580 0.5329 0.067 Uiso 1 1 calc R . . . .
 C50 C 1.1593(5) 0.1534(3) 0.7007(3) 0.0495(16) Uani 1 1 d . . . . .
 H50 H 1.2088 0.1307 0.7272 0.059 Uiso 1 1 calc R . . . .
 C35 C 0.4765(5) 0.2031(4) 0.7990(4) 0.062(2) Uani 1 1 d . . . . .
 H35 H 0.4183 0.1850 0.8173 0.074 Uiso 1 1 calc R . . . .
 C49 C 1.1969(5) 0.1944(3) 0.6609(3) 0.0485(16) Uani 1 1 d . . . . .
 H49 H 1.2716 0.2007 0.6609 0.058 Uiso 1 1 calc R . . . .
 C15 C 0.7623(4) 0.1606(2) 0.7714(3) 0.0307(12) Uani 1 1 d . . . . .
 C34 C 0.5731(5) 0.1724(3) 0.8000(4) 0.0505(17) Uani 1 1 d . . . . .
 C27 C 1.1679(4) 0.2057(2) 0.9314(3) 0.0328(12) Uani 1 1 d . . . . .
 C7 C 1.3121(4) 0.0532(2) 0.8501(3) 0.0309(11) Uani 1 1 d . . . . .
 H7 H 1.3791 0.0327 0.8549 0.037 Uiso 1 1 calc R . . . .
 C22 C 1.3397(4) -0.1010(3) 0.7833(3) 0.0371(13) Uani 1 1 d . . . . .
 C48 C 1.1278(5) 0.2269(3) 0.6207(3) 0.0438(14) Uani 1 1 d . . . . .
 H48 H 1.1542 0.2546 0.5919 0.053 Uiso 1 1 calc R . . . .
 C37 C 0.5493(5) 0.2864(3) 0.7440(3) 0.0403(13) Uani 1 1 d . . . . .
 H37 H 0.5424 0.3259 0.7252 0.048 Uiso 1 1 calc R . . . .
 C24 C 1.5093(5) -0.1134(3) 0.7443(3) 0.0475(16) Uani 1 1 d . . . . .
 H24 H 1.5716 -0.1373 0.7402 0.057 Uiso 1 1 calc R . . . .
 C42 C 0.7574(6) -0.0920(3) 0.4756(3) 0.0566(18) Uani 1 1 d . . . . .
 H42 H 0.7324 -0.1127 0.4389 0.068 Uiso 1 1 calc R . . . .
 C43 C 0.8062(5) -0.0353(3) 0.4721(3) 0.0439(14) Uani 1 1 d . . . . .
 H43 H 0.8130 -0.0163 0.4335 0.053 Uiso 1 1 calc R . . . .
 C47 C 1.0191(6) 0.2185(4) 0.6230(4) 0.063(2) Uani 1 1 d . . . . .
 H47 H 0.9699 0.2409 0.5960 0.076 Uiso 1 1 calc R . . . .
 C30 C 1.2676(6) 0.2850(3) 1.0193(3) 0.0521(17) Uani 1 1 d . . . . .
 H30 H 1.2999 0.3126 1.0492 0.063 Uiso 1 1 calc R . . . .
 C29 C 1.2264(6) 0.2300(3) 1.0374(3) 0.0563(18) Uani 1 1 d . . . . .
 H29 H 1.2313 0.2189 1.0795 0.068 Uiso 1 1 calc R . . . .
 O1 O 0.9389(3) 0.00844(17) 0.83132(18) 0.0370(9) Uani 1 1 d . . . . .
 O2 O 0.9916(6) 0.3272(3) 1.0140(3) 0.0891(19) Uani 1 1 d . . . . .
 C56 C 0.9877(9) 0.3026(6) 1.0754(5) 0.096(3) Uani 1 1 d . . . . .
 H56A H 0.9514 0.3323 1.1010 0.115 Uiso 1 1 calc R . . . .
 H56B H 1.0610 0.2957 1.0945 0.115 Uiso 1 1 calc R . . . .
 C57 C 1.0411(9) 0.3861(5) 1.0134(6) 0.102(4) Uani 1 1 d . . . . .
 H57A H 1.1152 0.3831 1.0326 0.122 Uiso 1 1 calc R . . . .
 H57B H 1.0018 0.4157 1.0376 0.122 Uiso 1 1 calc R . . . .
 C55 C 0.9259(9) 0.2411(5) 1.0705(5) 0.099(3) Uani 1 1 d . . . . .
 H55A H 0.8565 0.2476 1.0475 0.148 Uiso 1 1 calc GR . . . .
 H55B H 0.9151 0.2260 1.1117 0.148 Uiso 1 1 calc GR . . . .
 H55C H 0.9669 0.2105 1.0493 0.148 Uiso 1 1 calc GR . . . .
 C58 C 1.0421(10) 0.4103(7) 0.9458(6) 0.129(5) Uani 1 1 d . . . . .
 H58A H 1.0911 0.3850 0.9239 0.194 Uiso 1 1 calc GR . . . .
 H58B H 1.0659 0.4535 0.9463 0.194 Uiso 1 1 calc GR . . . .
 H58C H 0.9700 0.4075 0.9250 0.194 Uiso 1 1 calc GR . . . .
 C54 C 0.7592(5) -0.0344(3) 0.8191(4) 0.0517(17) Uani 1 1 d . . . . .
 H54A H 0.7211 -0.0317 0.7782 0.078 Uiso 0.470(11) 1 calc R . P A 1
 H54B H 0.7488 0.0040 0.8415 0.078 Uiso 0.470(11) 1 calc R . P A 1
 H54C H 0.7313 -0.0693 0.8413 0.078 Uiso 0.470(11) 1 calc R . P A 1
 H54D H 0.7616 -0.0286 0.7749 0.078 Uiso 0.530(11) 1 calc R . P A 2
 H54E H 0.6864 -0.0270 0.8301 0.078 Uiso 0.530(11) 1 calc R . P A 2
 H54F H 0.7804 -0.0769 0.8301 0.078 Uiso 0.530(11) 1 calc R . P A 2
 C52 C 1.0622(5) -0.0283(3) 0.9175(3) 0.0490(16) Uani 1 1 d . . . . .
 H52A H 1.0924 -0.0443 0.8809 0.074 Uiso 0.470(11) 1 calc R . P A 1
 H52B H 1.0392 -0.0629 0.9420 0.074 Uiso 0.470(11) 1 calc R . P A 1
 H52C H 1.1164 -0.0041 0.9419 0.074 Uiso 0.470(11) 1 calc R . P A 1
 H52D H 1.1311 -0.0089 0.9119 0.074 Uiso 0.530(11) 1 calc R . P A 2
 H52E H 1.0739 -0.0670 0.9403 0.074 Uiso 0.530(11) 1 calc R . P A 2
 H52F H 1.0190 -0.0002 0.9403 0.074 Uiso 0.530(11) 1 calc R . P A 2
 C51 C 0.9650(12) 0.0134(6) 0.8980(6) 0.047(4) Uani 0.470(11) 1 d . . P A 1
 H51A H 0.9029 0.0004 0.9197 0.056 Uiso 0.470(11) 1 calc R . P A 1
 H51B H 0.9819 0.0569 0.9091 0.056 Uiso 0.470(11) 1 calc R . P A 1
 C53 C 0.8773(11) -0.0440(6) 0.8131(6) 0.045(4) Uani 0.470(11) 1 d . . P A 1
 H53A H 0.9026 -0.0798 0.8386 0.055 Uiso 0.470(11) 1 calc R . P A 1
 H53B H 0.8880 -0.0539 0.7700 0.055 Uiso 0.470(11) 1 calc R . P A 1
 C51A C 1.0032(9) -0.0420(5) 0.8544(5) 0.039(3) Uani 0.530(11) 1 d . . P A 2
 H51C H 1.0562 -0.0518 0.8249 0.047 Uiso 0.530(11) 1 calc R . P A 2
 H51D H 0.9573 -0.0789 0.8577 0.047 Uiso 0.530(11) 1 calc R . P A 2
 C53A C 0.8351(9) 0.0106(5) 0.8533(6) 0.042(3) Uani 0.530(11) 1 d . . P A 2
 H53C H 0.8061 0.0531 0.8483 0.050 Uiso 0.530(11) 1 calc R . P A 2
 H53D H 0.8408 0.0005 0.8975 0.050 Uiso 0.530(11) 1 calc R . P A 2
 C60 C 0.5512(15) -0.0565(6) 0.9414(6) 0.153(4) Uani 1 1 d D U . . .
 H60A H 0.5123 -0.0407 0.9033 0.183 Uiso 1 1 calc R . . . .
 H60B H 0.6235 -0.0380 0.9445 0.183 Uiso 1 1 calc R . . . .
 C59 C 0.4942(14) -0.0350(2) 0.9951(6) 0.153(5) Uani 1 1 d D U . . .
 H59A H 0.5238 -0.0568 1.0326 0.184 Uiso 1 1 calc R . . . .
 H59B H 0.4175 -0.0456 0.9881 0.184 Uiso 1 1 calc R . . . .
 C61 C 0.5621(17) -0.1255(7) 0.9359(9) 0.183(6) Uani 1 1 d D U . . .
 H61A H 0.5615 -0.1369 0.8926 0.274 Uiso 1 1 calc GR . . . .
 H61B H 0.5024 -0.1458 0.9538 0.274 Uiso 1 1 calc GR . . . .
 H61C H 0.6296 -0.1388 0.9578 0.274 Uiso 1 1 calc GR . . . .

loop_
  _atom_site_aniso_label
  _atom_site_aniso_U_11
  _atom_site_aniso_U_22
  _atom_site_aniso_U_33
  _atom_site_aniso_U_23
  _atom_site_aniso_U_13
  _atom_site_aniso_U_12
 Ru1 0.0207(2) 0.0164(2) 0.0330(2) -0.00014(15) -0.00040(15) -0.00141(13)
 Cl5 0.0410(7) 0.0346(7) 0.0455(8) 0.0039(6) 0.0029(6) -0.0053(6)
 Cl7 0.0500(8) 0.0282(7) 0.0438(8) 0.0083(6) 0.0021(6) 0.0001(6)
 Cl1 0.0469(8) 0.0324(7) 0.0663(10) 0.0149(7) 0.0032(7) 0.0064(6)
 Cl2 0.0325(7) 0.0558(9) 0.0671(10) 0.0209(8) 0.0115(7) 0.0036(6)
 Cl8 0.0658(10) 0.0336(8) 0.0522(9) 0.0075(7) -0.0065(7) -0.0212(7)
 N3 0.023(2) 0.020(2) 0.038(2) -0.0014(18) 0.0015(18) -0.0034(16)
 N2 0.025(2) 0.021(2) 0.033(2) -0.0017(18) 0.0023(18) -0.0032(16)
 N4 0.023(2) 0.018(2) 0.040(2) -0.0023(18) 0.0008(18) -0.0027(16)
 N1 0.022(2) 0.019(2) 0.032(2) 0.0017(17) -0.0024(17) -0.0017(16)
 Cl6 0.0376(9) 0.0616(11) 0.154(2) 0.0578(13) 0.0281(11) 0.0106(8)
 Cl4 0.0618(9) 0.0346(7) 0.0477(8) 0.0063(6) -0.0020(7) -0.0198(7)
 Cl3 0.1025(15) 0.0518(10) 0.0479(9) 0.0095(8) 0.0131(9) -0.0258(10)
 C1 0.027(2) 0.018(2) 0.033(3) 0.000(2) 0.001(2) -0.0007(19)
 C4 0.025(2) 0.018(2) 0.031(3) 0.002(2) 0.001(2) 0.0015(19)
 C11 0.031(3) 0.018(2) 0.037(3) 0.000(2) 0.006(2) -0.003(2)
 C45 0.026(2) 0.020(2) 0.037(3) -0.004(2) -0.002(2) -0.002(2)
 C2 0.032(3) 0.020(2) 0.031(3) -0.001(2) -0.001(2) 0.003(2)
 C9 0.027(2) 0.022(2) 0.032(3) 0.001(2) 0.003(2) -0.004(2)
 C21 0.030(3) 0.030(3) 0.029(3) -0.004(2) -0.003(2) 0.005(2)
 C14 0.028(3) 0.021(2) 0.040(3) -0.003(2) 0.004(2) -0.003(2)
 C6 0.023(2) 0.022(2) 0.038(3) 0.005(2) -0.001(2) 0.0005(19)
 C10 0.032(3) 0.021(2) 0.033(3) 0.001(2) 0.002(2) -0.006(2)
 C20 0.025(2) 0.020(2) 0.035(3) 0.003(2) -0.005(2) -0.003(2)
 C46 0.035(3) 0.064(4) 0.069(5) 0.026(4) -0.008(3) -0.017(3)
 C19 0.027(3) 0.020(2) 0.037(3) 0.000(2) -0.005(2) -0.002(2)
 C39 0.027(3) 0.025(3) 0.036(3) -0.001(2) -0.007(2) 0.003(2)
 C8 0.028(3) 0.031(3) 0.039(3) 0.002(2) -0.003(2) -0.008(2)
 C5 0.025(3) 0.024(3) 0.036(3) 0.004(2) 0.003(2) -0.001(2)
 C12 0.037(3) 0.023(3) 0.045(3) -0.008(2) 0.007(2) -0.003(2)
 C13 0.032(3) 0.027(3) 0.052(3) -0.008(3) 0.009(3) 0.001(2)
 C17 0.022(3) 0.028(3) 0.058(4) -0.003(3) -0.004(2) 0.002(2)
 C33 0.028(3) 0.024(3) 0.048(3) -0.005(2) 0.004(2) 0.003(2)
 C16 0.026(3) 0.020(2) 0.049(3) 0.000(2) 0.001(2) -0.003(2)
 C32 0.035(3) 0.026(3) 0.044(3) -0.002(2) -0.001(2) -0.003(2)
 C31 0.042(3) 0.035(3) 0.057(4) -0.006(3) -0.006(3) -0.010(3)
 C3 0.032(3) 0.021(2) 0.033(3) 0.002(2) 0.002(2) 0.004(2)
 C38 0.033(3) 0.025(3) 0.040(3) -0.007(2) 0.003(2) -0.002(2)
 C26 0.032(3) 0.044(3) 0.039(3) 0.002(3) -0.001(2) 0.007(2)
 C18 0.022(3) 0.031(3) 0.053(3) -0.005(3) -0.008(2) -0.002(2)
 C36 0.030(3) 0.066(5) 0.084(5) 0.004(4) 0.015(3) 0.021(3)
 C28 0.060(4) 0.038(3) 0.037(3) 0.001(3) 0.003(3) -0.011(3)
 C25 0.029(3) 0.073(5) 0.049(4) 0.000(4) 0.004(3) 0.010(3)
 C40 0.046(3) 0.025(3) 0.046(3) -0.002(3) -0.009(3) -0.006(2)
 C23 0.046(4) 0.038(3) 0.049(4) -0.003(3) -0.010(3) 0.018(3)
 C44 0.029(3) 0.028(3) 0.040(3) 0.004(2) -0.005(2) 0.001(2)
 C41 0.066(4) 0.044(4) 0.053(4) 0.001(3) -0.017(3) -0.020(3)
 C50 0.036(3) 0.046(4) 0.067(4) 0.026(3) 0.004(3) 0.005(3)
 C35 0.034(3) 0.062(5) 0.093(6) 0.030(4) 0.024(4) 0.016(3)
 C49 0.037(3) 0.047(4) 0.063(4) 0.013(3) 0.012(3) -0.001(3)
 C15 0.027(3) 0.017(2) 0.048(3) 0.000(2) 0.005(2) -0.002(2)
 C34 0.032(3) 0.042(4) 0.078(5) 0.022(3) 0.014(3) 0.006(3)
 C27 0.030(3) 0.026(3) 0.042(3) -0.004(2) -0.002(2) 0.001(2)
 C7 0.024(2) 0.027(3) 0.041(3) -0.001(2) -0.003(2) -0.001(2)
 C22 0.033(3) 0.036(3) 0.040(3) -0.001(3) -0.003(2) 0.004(2)
 C48 0.052(4) 0.041(3) 0.039(3) 0.002(3) 0.004(3) -0.011(3)
 C37 0.046(3) 0.027(3) 0.047(3) -0.001(3) 0.002(3) 0.006(3)
 C24 0.030(3) 0.059(4) 0.051(4) -0.002(3) -0.005(3) 0.021(3)
 C42 0.063(4) 0.053(4) 0.050(4) -0.011(3) -0.018(3) -0.005(3)
 C43 0.045(3) 0.044(4) 0.041(3) -0.001(3) -0.008(3) 0.000(3)
 C47 0.052(4) 0.059(4) 0.075(5) 0.033(4) -0.012(4) -0.013(3)
 C30 0.057(4) 0.040(4) 0.056(4) -0.011(3) -0.010(3) -0.007(3)
 C29 0.068(5) 0.058(4) 0.041(4) -0.001(3) -0.004(3) -0.003(4)
 O1 0.035(2) 0.030(2) 0.046(2) 0.0000(18) 0.0067(17) -0.0069(16)
 O2 0.096(5) 0.085(4) 0.084(4) -0.017(4) -0.008(4) 0.011(4)
 C56 0.095(7) 0.125(9) 0.067(6) -0.009(6) -0.002(5) 0.030(7)
 C57 0.084(7) 0.080(7) 0.137(10) -0.040(7) -0.011(7) 0.005(6)
 C55 0.105(8) 0.103(8) 0.093(7) 0.014(6) 0.031(6) 0.039(7)
 C58 0.082(8) 0.188(15) 0.120(10) 0.047(10) 0.015(7) 0.045(8)
 C54 0.041(3) 0.041(4) 0.073(5) 0.001(3) 0.004(3) -0.013(3)
 C52 0.051(4) 0.046(4) 0.049(4) 0.010(3) 0.001(3) -0.005(3)
 C51 0.055(8) 0.040(7) 0.046(8) -0.012(6) 0.006(6) -0.012(6)
 C53 0.049(8) 0.042(8) 0.045(8) 0.007(6) 0.002(6) -0.015(6)
 C51A 0.038(6) 0.033(6) 0.048(7) 0.009(5) 0.007(5) 0.004(5)
 C53A 0.035(6) 0.032(6) 0.058(7) -0.002(5) 0.003(5) 0.000(5)
 C60 0.203(12) 0.139(8) 0.122(8) 0.024(8) 0.044(8) 0.046(9)
 C59 0.204(12) 0.141(9) 0.119(8) 0.040(8) 0.042(8) 0.047(10)
 C61 0.243(16) 0.144(10) 0.157(12) -0.011(10) -0.006(12) 0.028(12)

_geom_special_details
;
 All esds (except the esd in the dihedral angle between two l.s. planes)
 are estimated using the full covariance matrix.  The cell esds are taken
 into account individually in the estimation of esds in distances, angles
 and torsion angles; correlations between esds in cell parameters are only
 used when they are defined by crystal symmetry.  An approximate (isotropic)
 treatment of cell esds is used for estimating esds involving l.s. planes.
;
loop_
  _geom_bond_atom_site_label_1
  _geom_bond_atom_site_label_2
  _geom_bond_distance
  _geom_bond_site_symmetry_2
  _geom_bond_publ_flag
 Ru1 N3 2.036(4) . ?
 Ru1 N2 2.028(4) . ?
 Ru1 N4 2.033(4) . ?
 Ru1 N1 2.026(4) . ?
 Ru1 C45 2.053(5) . ?
 Ru1 O1 2.308(4) . ?
 Cl5 C38 1.738(6) . ?
 Cl7 C44 1.738(5) . ?
 Cl1 C22 1.737(6) . ?
 Cl2 C26 1.742(6) . ?
 Cl8 C40 1.738(6) . ?
 N3 C11 1.378(7) . ?
 N3 C14 1.373(7) . ?
 N2 C9 1.381(7) . ?
 N2 C6 1.378(6) . ?
 N4 C19 1.380(7) . ?
 N4 C16 1.380(7) . ?
 N1 C1 1.368(6) . ?
 N1 C4 1.381(6) . ?
 Cl6 C34 1.743(6) . ?
 Cl4 C32 1.741(6) . ?
 Cl3 C28 1.734(6) . ?
 C1 C2 1.426(7) . ?
 C1 C20 1.403(7) . ?
 C4 C5 1.406(7) . ?
 C4 C3 1.427(7) . ?
 C11 C10 1.399(7) . ?
 C11 C12 1.433(7) . ?
 C45 C46 1.380(8) . ?
 C45 C50 1.382(8) . ?
 C2 C3 1.353(7) . ?
 C9 C10 1.395(7) . ?
 C9 C8 1.434(7) . ?
 C21 C5 1.495(7) . ?
 C21 C26 1.393(8) . ?
 C21 C22 1.390(8) . ?
 C14 C13 1.444(8) . ?
 C14 C15 1.396(8) . ?
 C6 C5 1.386(8) . ?
 C6 C7 1.442(7) . ?
 C10 C27 1.492(7) . ?
 C20 C19 1.385(7) . ?
 C20 C39 1.491(7) . ?
 C46 C47 1.376(9) . ?
 C19 C18 1.440(7) . ?
 C39 C40 1.393(8) . ?
 C39 C44 1.394(8) . ?
 C8 C7 1.349(8) . ?
 C12 C13 1.351(8) . ?
 C17 C16 1.440(8) . ?
 C17 C18 1.354(8) . ?
 C33 C38 1.390(8) . ?
 C33 C15 1.498(7) . ?
 C33 C34 1.385(8) . ?
 C16 C15 1.383(8) . ?
 C32 C31 1.380(8) . ?
 C32 C27 1.382(8) . ?
 C31 C30 1.353(10) . ?
 C38 C37 1.394(8) . ?
 C26 C25 1.403(8) . ?
 C36 C35 1.373(10) . ?
 C36 C37 1.382(10) . ?
 C28 C27 1.397(8) . ?
 C28 C29 1.379(9) . ?
 C25 C24 1.365(10) . ?
 C40 C41 1.390(9) . ?
 C23 C22 1.395(8) . ?
 C23 C24 1.369(10) . ?
 C44 C43 1.387(8) . ?
 C41 C42 1.376(10) . ?
 C50 C49 1.357(9) . ?
 C35 C34 1.383(9) . ?
 C49 C48 1.375(9) . ?
 C48 C47 1.384(10) . ?
 C42 C43 1.375(10) . ?
 C30 C29 1.369(10) . ?
 O1 C51 1.473(14) . ?
 O1 C53 1.411(13) . ?
 O1 C51A 1.424(11) . ?
 O1 C53A 1.431(12) . ?
 O2 C56 1.450(12) . ?
 O2 C57 1.418(12) . ?
 C56 C55 1.539(16) . ?
 C57 C58 1.573(17) . ?
 C54 C53 1.517(15) . ?
 C54 C53A 1.515(13) . ?
 C52 C51 1.548(16) . ?
 C52 C51A 1.540(13) . ?
 C60 C59 1.505(9) . ?
 C60 C61 1.504(9) . ?
 C59 C59 1.532(10) 3_657 ?

loop_
  _geom_angle_atom_site_label_1
  _geom_angle_atom_site_label_2
  _geom_angle_atom_site_label_3
  _geom_angle
  _geom_angle_site_symmetry_1
  _geom_angle_site_symmetry_3
  _geom_angle_publ_flag
 N3 Ru1 C45 91.37(19) . . ?
 N3 Ru1 O1 88.89(15) . . ?
 N2 Ru1 N3 90.22(16) . . ?
 N2 Ru1 N4 176.39(17) . . ?
 N2 Ru1 C45 91.92(18) . . ?
 N2 Ru1 O1 86.80(15) . . ?
 N4 Ru1 N3 89.79(16) . . ?
 N4 Ru1 C45 91.69(18) . . ?
 N4 Ru1 O1 89.59(15) . . ?
 N1 Ru1 N3 177.07(16) . . ?
 N1 Ru1 N2 89.90(16) . . ?
 N1 Ru1 N4 89.92(16) . . ?
 N1 Ru1 C45 91.55(18) . . ?
 N1 Ru1 O1 88.19(15) . . ?
 C45 Ru1 O1 178.70(17) . . ?
 C11 N3 Ru1 126.5(3) . . ?
 C14 N3 Ru1 126.5(3) . . ?
 C14 N3 C11 107.0(4) . . ?
 C9 N2 Ru1 126.8(3) . . ?
 C6 N2 Ru1 127.2(3) . . ?
 C6 N2 C9 106.0(4) . . ?
 C19 N4 Ru1 126.5(3) . . ?
 C19 N4 C16 106.4(4) . . ?
 C16 N4 Ru1 127.0(4) . . ?
 C1 N1 Ru1 127.1(3) . . ?
 C1 N1 C4 105.7(4) . . ?
 C4 N1 Ru1 127.2(3) . . ?
 N1 C1 C2 110.2(4) . . ?
 N1 C1 C20 125.1(5) . . ?
 C20 C1 C2 124.7(5) . . ?
 N1 C4 C5 124.7(5) . . ?
 N1 C4 C3 110.0(4) . . ?
 C5 C4 C3 125.3(5) . . ?
 N3 C11 C10 125.1(5) . . ?
 N3 C11 C12 109.6(5) . . ?
 C10 C11 C12 125.3(5) . . ?
 C46 C45 Ru1 121.8(4) . . ?
 C46 C45 C50 116.8(5) . . ?
 C50 C45 Ru1 121.3(4) . . ?
 C3 C2 C1 107.3(5) . . ?
 N2 C9 C10 125.1(5) . . ?
 N2 C9 C8 109.9(4) . . ?
 C10 C9 C8 125.0(5) . . ?
 C26 C21 C5 122.1(5) . . ?
 C22 C21 C5 121.6(5) . . ?
 C22 C21 C26 116.3(5) . . ?
 N3 C14 C13 108.6(5) . . ?
 N3 C14 C15 125.9(5) . . ?
 C15 C14 C13 125.5(5) . . ?
 N2 C6 C5 125.1(5) . . ?
 N2 C6 C7 109.5(4) . . ?
 C5 C6 C7 125.3(5) . . ?
 C11 C10 C27 116.5(5) . . ?
 C9 C10 C11 126.0(5) . . ?
 C9 C10 C27 117.5(5) . . ?
 C1 C20 C39 116.9(5) . . ?
 C19 C20 C1 125.6(5) . . ?
 C19 C20 C39 117.5(4) . . ?
 C47 C46 C45 121.9(6) . . ?
 N4 C19 C20 125.4(4) . . ?
 N4 C19 C18 109.8(5) . . ?
 C20 C19 C18 124.7(5) . . ?
 C40 C39 C20 122.2(5) . . ?
 C40 C39 C44 116.5(5) . . ?
 C44 C39 C20 121.3(5) . . ?
 C7 C8 C9 107.3(5) . . ?
 C4 C5 C21 115.8(5) . . ?
 C6 C5 C4 125.9(5) . . ?
 C6 C5 C21 118.2(5) . . ?
 C13 C12 C11 106.9(5) . . ?
 C12 C13 C14 107.9(5) . . ?
 C18 C17 C16 107.9(5) . . ?
 C38 C33 C15 122.1(5) . . ?
 C34 C33 C38 115.5(5) . . ?
 C34 C33 C15 122.3(5) . . ?
 N4 C16 C17 109.1(5) . . ?
 N4 C16 C15 125.2(5) . . ?
 C15 C16 C17 125.6(5) . . ?
 C31 C32 Cl4 119.0(5) . . ?
 C31 C32 C27 122.8(6) . . ?
 C27 C32 Cl4 118.1(4) . . ?
 C30 C31 C32 119.3(6) . . ?
 C2 C3 C4 106.9(5) . . ?
 C33 C38 Cl5 118.5(4) . . ?
 C33 C38 C37 123.5(5) . . ?
 C37 C38 Cl5 117.9(4) . . ?
 C21 C26 Cl2 119.0(4) . . ?
 C21 C26 C25 122.1(6) . . ?
 C25 C26 Cl2 118.9(5) . . ?
 C17 C18 C19 106.7(5) . . ?
 C35 C36 C37 120.6(6) . . ?
 C27 C28 Cl3 118.9(5) . . ?
 C29 C28 Cl3 118.8(5) . . ?
 C29 C28 C27 122.2(6) . . ?
 C24 C25 C26 118.9(6) . . ?
 C39 C40 Cl8 118.6(4) . . ?
 C41 C40 Cl8 119.3(5) . . ?
 C41 C40 C39 122.2(6) . . ?
 C24 C23 C22 118.9(6) . . ?
 C39 C44 Cl7 118.0(4) . . ?
 C43 C44 Cl7 119.4(5) . . ?
 C43 C44 C39 122.6(5) . . ?
 C42 C41 C40 118.7(6) . . ?
 C49 C50 C45 122.1(6) . . ?
 C36 C35 C34 119.5(6) . . ?
 C50 C49 C48 120.7(6) . . ?
 C14 C15 C33 118.4(5) . . ?
 C16 C15 C14 125.6(5) . . ?
 C16 C15 C33 116.0(5) . . ?
 C33 C34 Cl6 118.6(5) . . ?
 C35 C34 Cl6 118.6(5) . . ?
 C35 C34 C33 122.8(6) . . ?
 C32 C27 C10 121.7(5) . . ?
 C32 C27 C28 115.5(5) . . ?
 C28 C27 C10 122.8(5) . . ?
 C8 C7 C6 107.3(5) . . ?
 C21 C22 Cl1 119.0(4) . . ?
 C21 C22 C23 122.5(6) . . ?
 C23 C22 Cl1 118.5(5) . . ?
 C49 C48 C47 118.7(6) . . ?
 C36 C37 C38 118.0(6) . . ?
 C25 C24 C23 121.4(6) . . ?
 C43 C42 C41 121.5(6) . . ?
 C42 C43 C44 118.5(6) . . ?
 C46 C47 C48 119.8(6) . . ?
 C31 C30 C29 120.8(6) . . ?
 C30 C29 C28 119.2(6) . . ?
 C51 O1 Ru1 122.3(6) . . ?
 C53 O1 Ru1 123.6(6) . . ?
 C53 O1 C51 114.1(8) . . ?
 C51A O1 Ru1 122.8(5) . . ?
 C51A O1 C53A 114.3(7) . . ?
 C53A O1 Ru1 122.8(5) . . ?
 C57 O2 C56 112.8(9) . . ?
 O2 C56 C55 108.1(8) . . ?
 O2 C57 C58 110.3(10) . . ?
 O1 C51 C52 109.4(9) . . ?
 O1 C53 C54 112.5(10) . . ?
 O1 C51A C52 112.6(8) . . ?
 O1 C53A C54 111.5(8) . . ?
 C61 C60 C59 115.0(12) . . ?
 C60 C59 C59 111.6(13) . 3_657 ?

loop_
  _geom_torsion_atom_site_label_1
  _geom_torsion_atom_site_label_2
  _geom_torsion_atom_site_label_3
  _geom_torsion_atom_site_label_4
  _geom_torsion
  _geom_torsion_site_symmetry_1
  _geom_torsion_site_symmetry_2
  _geom_torsion_site_symmetry_3
  _geom_torsion_site_symmetry_4
  _geom_torsion_publ_flag
 Ru1 N3 C11 C10 -2.8(7) . . . . ?
 Ru1 N3 C11 C12 178.0(3) . . . . ?
 Ru1 N3 C14 C13 -178.5(4) . . . . ?
 Ru1 N3 C14 C15 0.8(8) . . . . ?
 Ru1 N2 C9 C10 1.8(7) . . . . ?
 Ru1 N2 C9 C8 -177.7(3) . . . . ?
 Ru1 N2 C6 C5 -0.8(7) . . . . ?
 Ru1 N2 C6 C7 178.2(3) . . . . ?
 Ru1 N4 C19 C20 3.0(7) . . . . ?
 Ru1 N4 C19 C18 -177.9(4) . . . . ?
 Ru1 N4 C16 C17 178.0(4) . . . . ?
 Ru1 N4 C16 C15 0.8(8) . . . . ?
 Ru1 N1 C1 C2 177.7(3) . . . . ?
 Ru1 N1 C1 C20 -1.1(7) . . . . ?
 Ru1 N1 C4 C5 2.6(7) . . . . ?
 Ru1 N1 C4 C3 -177.9(3) . . . . ?
 Ru1 C45 C46 C47 -177.5(6) . . . . ?
 Ru1 C45 C50 C49 178.9(6) . . . . ?
 Ru1 O1 C51 C52 -97.7(8) . . . . ?
 Ru1 O1 C53 C54 -98.7(9) . . . . ?
 Ru1 O1 C51A C52 96.4(8) . . . . ?
 Ru1 O1 C53A C54 99.9(8) . . . . ?
 Cl5 C38 C37 C36 178.8(5) . . . . ?
 Cl7 C44 C43 C42 179.0(5) . . . . ?
 Cl2 C26 C25 C24 -177.7(5) . . . . ?
 Cl8 C40 C41 C42 179.1(6) . . . . ?
 N3 C11 C10 C9 -2.8(9) . . . . ?
 N3 C11 C10 C27 174.8(5) . . . . ?
 N3 C11 C12 C13 0.3(6) . . . . ?
 N3 C14 C13 C12 1.1(6) . . . . ?
 N3 C14 C15 C33 -179.1(5) . . . . ?
 N3 C14 C15 C16 0.5(9) . . . . ?
 N2 C9 C10 C11 3.4(8) . . . . ?
 N2 C9 C10 C27 -174.2(5) . . . . ?
 N2 C9 C8 C7 -0.1(6) . . . . ?
 N2 C6 C5 C4 0.2(8) . . . . ?
 N2 C6 C5 C21 176.9(5) . . . . ?
 N2 C6 C7 C8 -1.3(6) . . . . ?
 N4 C19 C18 C17 0.2(6) . . . . ?
 N4 C16 C15 C14 -1.4(9) . . . . ?
 N4 C16 C15 C33 178.3(5) . . . . ?
 N1 C1 C2 C3 -0.2(6) . . . . ?
 N1 C1 C20 C19 -4.1(8) . . . . ?
 N1 C1 C20 C39 174.5(5) . . . . ?
 N1 C4 C5 C21 -177.9(5) . . . . ?
 N1 C4 C5 C6 -1.2(8) . . . . ?
 N1 C4 C3 C2 0.7(6) . . . . ?
 Cl4 C32 C31 C30 178.7(5) . . . . ?
 Cl4 C32 C27 C10 0.7(7) . . . . ?
 Cl4 C32 C27 C28 179.6(5) . . . . ?
 Cl3 C28 C27 C10 1.3(8) . . . . ?
 Cl3 C28 C27 C32 -177.6(5) . . . . ?
 Cl3 C28 C29 C30 179.2(6) . . . . ?
 C1 N1 C4 C5 179.7(5) . . . . ?
 C1 N1 C4 C3 -0.8(5) . . . . ?
 C1 C2 C3 C4 -0.3(6) . . . . ?
 C1 C20 C19 N4 3.0(9) . . . . ?
 C1 C20 C19 C18 -175.9(5) . . . . ?
 C1 C20 C39 C40 86.8(7) . . . . ?
 C1 C20 C39 C44 -93.0(6) . . . . ?
 C4 N1 C1 C2 0.6(5) . . . . ?
 C4 N1 C1 C20 -178.2(5) . . . . ?
 C11 N3 C14 C13 -0.9(6) . . . . ?
 C11 N3 C14 C15 178.4(5) . . . . ?
 C11 C10 C27 C32 -83.3(7) . . . . ?
 C11 C10 C27 C28 97.9(7) . . . . ?
 C11 C12 C13 C14 -0.8(6) . . . . ?
 C45 C46 C47 C48 -1.0(13) . . . . ?
 C45 C50 C49 C48 -1.7(11) . . . . ?
 C2 C1 C20 C19 177.2(5) . . . . ?
 C2 C1 C20 C39 -4.2(8) . . . . ?
 C9 N2 C6 C5 -177.8(5) . . . . ?
 C9 N2 C6 C7 1.2(6) . . . . ?
 C9 C10 C27 C32 94.6(6) . . . . ?
 C9 C10 C27 C28 -84.3(7) . . . . ?
 C9 C8 C7 C6 0.9(6) . . . . ?
 C21 C26 C25 C24 0.3(10) . . . . ?
 C14 N3 C11 C10 179.6(5) . . . . ?
 C14 N3 C11 C12 0.4(6) . . . . ?
 C6 N2 C9 C10 178.9(5) . . . . ?
 C6 N2 C9 C8 -0.7(6) . . . . ?
 C10 C11 C12 C13 -178.9(5) . . . . ?
 C10 C9 C8 C7 -179.7(5) . . . . ?
 C20 C1 C2 C3 178.6(5) . . . . ?
 C20 C19 C18 C17 179.3(5) . . . . ?
 C20 C39 C40 Cl8 2.5(8) . . . . ?
 C20 C39 C40 C41 -177.9(6) . . . . ?
 C20 C39 C44 Cl7 -1.1(7) . . . . ?
 C20 C39 C44 C43 178.4(5) . . . . ?
 C46 C45 C50 C49 -0.2(10) . . . . ?
 C19 N4 C16 C17 0.4(6) . . . . ?
 C19 N4 C16 C15 -176.7(5) . . . . ?
 C19 C20 C39 C40 -94.6(6) . . . . ?
 C19 C20 C39 C44 85.7(6) . . . . ?
 C39 C20 C19 N4 -175.5(5) . . . . ?
 C39 C20 C19 C18 5.6(8) . . . . ?
 C39 C40 C41 C42 -0.5(11) . . . . ?
 C39 C44 C43 C42 -0.5(9) . . . . ?
 C8 C9 C10 C11 -177.2(5) . . . . ?
 C8 C9 C10 C27 5.2(8) . . . . ?
 C5 C4 C3 C2 -179.8(5) . . . . ?
 C5 C21 C26 Cl2 0.8(7) . . . . ?
 C5 C21 C26 C25 -177.2(6) . . . . ?
 C5 C21 C22 Cl1 -1.9(7) . . . . ?
 C5 C21 C22 C23 176.4(5) . . . . ?
 C5 C6 C7 C8 177.7(5) . . . . ?
 C12 C11 C10 C9 176.2(5) . . . . ?
 C12 C11 C10 C27 -6.1(8) . . . . ?
 C13 C14 C15 C33 0.0(8) . . . . ?
 C13 C14 C15 C16 179.7(5) . . . . ?
 C17 C16 C15 C14 -178.1(5) . . . . ?
 C17 C16 C15 C33 1.6(8) . . . . ?
 C33 C38 C37 C36 -1.6(9) . . . . ?
 C16 N4 C19 C20 -179.4(5) . . . . ?
 C16 N4 C19 C18 -0.4(6) . . . . ?
 C16 C17 C18 C19 0.1(7) . . . . ?
 C32 C31 C30 C29 1.5(11) . . . . ?
 C31 C32 C27 C10 179.2(5) . . . . ?
 C31 C32 C27 C28 -1.9(9) . . . . ?
 C31 C30 C29 C28 -1.5(11) . . . . ?
 C3 C4 C5 C21 2.7(7) . . . . ?
 C3 C4 C5 C6 179.4(5) . . . . ?
 C38 C33 C15 C14 82.5(7) . . . . ?
 C38 C33 C15 C16 -97.2(6) . . . . ?
 C38 C33 C34 Cl6 179.5(5) . . . . ?
 C38 C33 C34 C35 0.5(11) . . . . ?
 C26 C21 C5 C4 92.5(6) . . . . ?
 C26 C21 C5 C6 -84.5(7) . . . . ?
 C26 C21 C22 Cl1 -179.4(4) . . . . ?
 C26 C21 C22 C23 -1.1(8) . . . . ?
 C26 C25 C24 C23 0.0(10) . . . . ?
 C18 C17 C16 N4 -0.3(7) . . . . ?
 C18 C17 C16 C15 176.8(5) . . . . ?
 C36 C35 C34 Cl6 179.7(7) . . . . ?
 C36 C35 C34 C33 -1.2(13) . . . . ?
 C40 C39 C44 Cl7 179.1(4) . . . . ?
 C40 C39 C44 C43 -1.4(8) . . . . ?
 C40 C41 C42 C43 -1.5(12) . . . . ?
 C44 C39 C40 Cl8 -177.7(4) . . . . ?
 C44 C39 C40 C41 1.9(9) . . . . ?
 C41 C42 C43 C44 2.0(11) . . . . ?
 C50 C45 C46 C47 1.5(11) . . . . ?
 C50 C49 C48 C47 2.2(11) . . . . ?
 C35 C36 C37 C38 0.8(11) . . . . ?
 C49 C48 C47 C46 -0.8(12) . . . . ?
 C15 C14 C13 C12 -178.2(5) . . . . ?
 C15 C33 C38 Cl5 -2.5(8) . . . . ?
 C15 C33 C38 C37 177.9(5) . . . . ?
 C15 C33 C34 Cl6 2.6(9) . . . . ?
 C15 C33 C34 C35 -176.5(7) . . . . ?
 C34 C33 C38 Cl5 -179.4(5) . . . . ?
 C34 C33 C38 C37 1.0(9) . . . . ?
 C34 C33 C15 C14 -100.8(7) . . . . ?
 C34 C33 C15 C16 79.5(8) . . . . ?
 C27 C32 C31 C30 0.2(10) . . . . ?
 C27 C28 C29 C30 -0.4(11) . . . . ?
 C7 C6 C5 C4 -178.6(5) . . . . ?
 C7 C6 C5 C21 -2.0(8) . . . . ?
 C22 C21 C5 C4 -84.8(6) . . . . ?
 C22 C21 C5 C6 98.2(6) . . . . ?
 C22 C21 C26 Cl2 178.2(4) . . . . ?
 C22 C21 C26 C25 0.2(9) . . . . ?
 C22 C23 C24 C25 -0.8(10) . . . . ?
 C37 C36 C35 C34 0.6(13) . . . . ?
 C24 C23 C22 Cl1 179.7(5) . . . . ?
 C24 C23 C22 C21 1.4(9) . . . . ?
 C29 C28 C27 C10 -179.1(6) . . . . ?
 C29 C28 C27 C32 2.0(10) . . . . ?
 C56 O2 C57 C58 -179.7(8) . . . . ?
 C57 O2 C56 C55 176.2(8) . . . . ?
 C51 O1 C53 C54 82.1(12) . . . . ?
 C51 O1 C51A C52 -19.0(8) . . . . ?
 C51 O1 C53A C54 -139.2(10) . . . . ?
 C51 C52 C51A O1 18.8(8) . . . . ?
 C53 O1 C51 C52 81.6(11) . . . . ?
 C53 O1 C51A C52 -142.2(10) . . . . ?
 C53 O1 C53A C54 -16.9(9) . . . . ?
 C53 C54 C53A O1 16.3(8) . . . . ?
 C51A O1 C51 C52 18.5(8) . . . . ?
 C51A O1 C53 C54 140.7(11) . . . . ?
 C51A O1 C53A C54 -79.5(10) . . . . ?
 C51A C52 C51 O1 -17.7(7) . . . . ?
 C53A O1 C51 C52 140.8(10) . . . . ?
 C53A O1 C53 C54 17.0(9) . . . . ?
 C53A O1 C51A C52 -84.2(9) . . . . ?
 C53A C54 C53 O1 -16.7(9) . . . . ?
 C61 C60 C59 C59 168.6(18) . . . 3_657 ?

_olex2_submission_special_instructions 'No special instructions were received'
